# Supplementary material
Source: PubMed Central journal article supplement (PMC3248291)
Supplement: JCI58393sd.pdf [file JCI58393sd.pdf]

## Supplemental figure legends

**S1. Loss of LXR signaling does not impact neutrophil influx.** (A) WT mice were treated with 3% thioglycolate for up to 5 h after which peritoneal fluid was collected and the frequency of GR-1<sup>hi</sup>CD11b<sup>hi</sup> cells in lavage was assessed to confirm kinetics of neutrophil influx. (B) WT and LXR $\alpha\beta$  null mice were injected i.p. with PBS or 3% thioglycolate. After 3 h, peritoneal fluid was collected and the frequency of GR-1<sup>hi</sup> CD11b<sup>hi</sup> cells in lavage was assessed by flow cytometry. FACS plot is representative of 3 mice/group.

**S2. LXR signaling influences neutrophil homeostasis.** (A) Eye bleed were performed on 6-8 week old WT and LXR $\alpha\beta$  null mice and frequency of neutrophils determined by Hemavet analyzer. Each point represents an individual mouse. (B) Representative FACS plots of Ly6G<sup>hi</sup> BrdU<sup>+</sup> cells gated through CD11b<sup>+</sup> in peripheral blood of 6-8 week old WT or LXR $\alpha\beta$  null mice on indicated day post-BrdU (2mg/mL) injection. Frequency of Ly6G<sup>hi</sup> BrdU<sup>+</sup> cells indicated in the plot. Each plot is representative of 4 mice/group.

**S3. No detectable inflammatory or neutrophilic cytokines in young LXR $\alpha\beta$  null mice.** Serum was collected from (A) 6-8 week old WT and LXR $\alpha\beta$  null mice or (B) 9 month old mice and indicated cytokine concentrations determined by Luminex Analysis. Each point represents an individual mouse. \*p<0.05

**S4. Accumulation of neutrophils requires loss of both LXR $\alpha$  and LXR $\beta$ .** (A) Spleen and LN counts from 6-8 week old WT and LXR $\alpha\beta$  null mice. (B) An accumulation of neutrophils in LN of LXR $\alpha\beta$  null mice. Frequency of GR-1<sup>hi</sup>CD11b<sup>hi</sup> cells in Inguinal, Axillary and Cervical LNs was determined by FACS analysis. (C) Eye bleed were performed on 6-8 week old WT, LXR $\alpha$  and LXR $\beta$  null mice, and the frequency of neutrophils determined by Hemavet analyzer. Each point represents an individual mouse. (D,E) Frequency and absolute number of GR-1<sup>hi</sup>CD11b<sup>hi</sup> cells in spleens of 6-8 week old WT, LXR $\alpha$  and LXR $\beta$  null mice. FACS plots are representative of >10 mice examined.

**S5. Accumulation of neutrophils in spleens of young LXR $\alpha\beta$  null mice. (A)**

Representative FACS plots of WT and LXR $\alpha\beta$  null spleen cells stained for neutrophil markers GR-1, Ly-6G and MCA771. The frequency of neutrophils indicated in FACS plots and is representative of > than 10 mice per genotype. (B) No evidence for a difference in extramedullary hematopoiesis in spleens of LXR $\alpha\beta$  null mice. To determine myelo-erythroid potential,  $3 \times 10^4$  spleen cells were plated under standard differentiation conditions. Colonies were scored on day 8.

**S6. No evidence for neutrophil activation or generalized cytokine production from**

**T cells.** (A) No difference in activation state of neutrophils *ex vivo*. CD11b and CD62L expression pattern was determined on Ly-6G<sup>+</sup> cells from spleen of WT and LXR $\alpha\beta$  null mice by FACS analysis. (B) Intracellular IL-2 and IFN- $\gamma$  production from spleen cells stimulated for 5 h with PMA/ionomycin in the presence of Bref A. Cells were analyzed by flow cytometry. FACS plots are gated through a logical lymphocyte gate and Thy1<sup>+</sup>. Data presented is representative of 3 mice/group repeated twice. (C) No evidence for pro-inflammatory *IL-1b*, *Cxcl1* and *Cxcl2* gene expression in skin of 6-8 week old LXR $\alpha\beta$  null mice. Data is from 5 mice/group.

**S7. A modest increase in numbers of tissue macrophage and DCs in young**

**LXR $\alpha\beta$  null mice.** (A) *Itgam* (CD11b), *Emr1* (F4/80) and *CD68* gene expression in liver and spleen of 6-8 week old WT and LXR $\alpha\beta$  null mice. (B) Total numbers of neutrophils (CD11b<sup>hi</sup> Ly6G<sup>hi</sup>), macrophage (F4/80<sup>+</sup> MHC class II<sup>+</sup>) and DCs (CD11c<sup>+</sup> MHC class

II+) from spleen of 6-8 week old WT and LXR $\alpha\beta$  null mice. Total cell numbers were computed by multiplying the frequency of subsets by the total splenocyte counts. Data is from 5 mice/group.

### **S8. Clearance of adoptively transferred neutrophils in bone marrow or spleen.**

Flow cytometric analysis of bone marrow Ly6G+GFP+ cells in spleen at 18 h (A) or bone marrow at 40 h (B) post-adoptive transfer into WT and LXR $\alpha\beta$  null mice.

Frequency of GFP+ cells is indicated in plot. FACS plots are representative of 3 mice.

### **S9. Phagocytosis of apoptotic neutrophils activates LXR and drives expression of**

**Mertk.** *Abca1* expression from thioglycolate-elicited macrophage co-cultured with apoptotic neutrophils for 90 min. LXR ligand GW3965 (1 $\mu$ M for 5h) treated macrophage served as a positive control for upregulation of LXR target genes. (B) WT and LXR $\alpha\beta$  null bone marrow-derived myeloid DCs were treated with LXR ligand GW3965 (1 $\mu$ M) or vehicle for 5h and *Mertk* and *Axl* gene expression determined. *Tyro3* gene expression was not detectable. \*\* $p < 0.01$ , \*\*\* $p < 0.001$

**S10. Mertk is required for efficient aged neutrophil clearance.** (A,B) Confocal microscopy images and quantification of neutrophil phagocytosis. WT bone marrow-derived macrophage were treated with control IgG or anti-Mer Ab and then co-cultured with aged neutrophils for 90 min. Afterwards, cultures were extensively washed with cold PBS and enzyme free cell dissociation buffer to remove non- and semi-adherent neutrophils. Cells were stained for CD68 expression and Ly6G expression to distinguish

macrophages from neutrophils and phagocytic index determined. Data is representative of 3 experiments performed in triplicate.

**S11. Altered peripheral neutrophil homeostasis in young *Mertk*<sup>-/-</sup> and *Gas6*<sup>-/-</sup> mice.** (A,B,C) Frequency of spleen and bone marrow GR-1<sup>hi</sup>CD11b<sup>hi</sup> cells from 5-6 week old WT, *Gas6*<sup>-/-</sup> or *Mertk*<sup>-/-</sup> null mice. FACS plots are representative of 4 mice/group.

**S12. A model of LXR-mediated control of neutrophil homeostasis.** LXR signaling drives expression of Mer promoting the engulfment of apoptotic neutrophils bound to Gas6 protein. Phagocytosis of neutrophils via Mer activates LXRs leading to the further up-regulation of Mer in a positive feedback loop. Phagocytosis of aged neutrophils upregulates Gas6 in an LXR-independent manner. Concomitantly, activation of LXR by apoptotic neutrophils also represses IL-23 gene expression resulting in the attenuation of the IL-17 expression in T cells and downstream G-CSF from bone marrow. In addition, Mer signaling further reinforces the anti-inflammatory program in APC by down modulating inflammatory receptor signaling as described by Lemke and colleagues (44). In combination, the LXR and Mer signaling axis set the IL-23/IL-17 granulopoietic cytokine cascade under non-inflammatory conditions.

A.

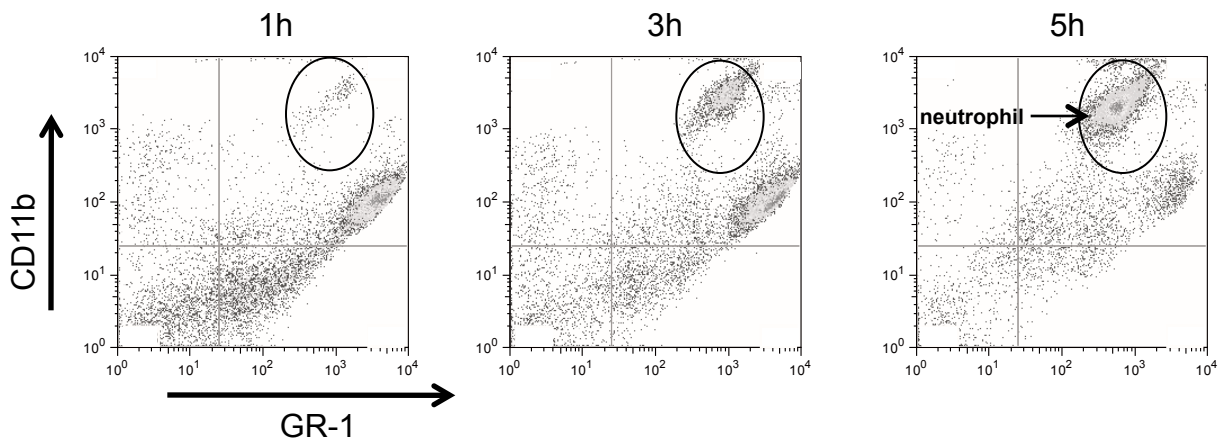

B.

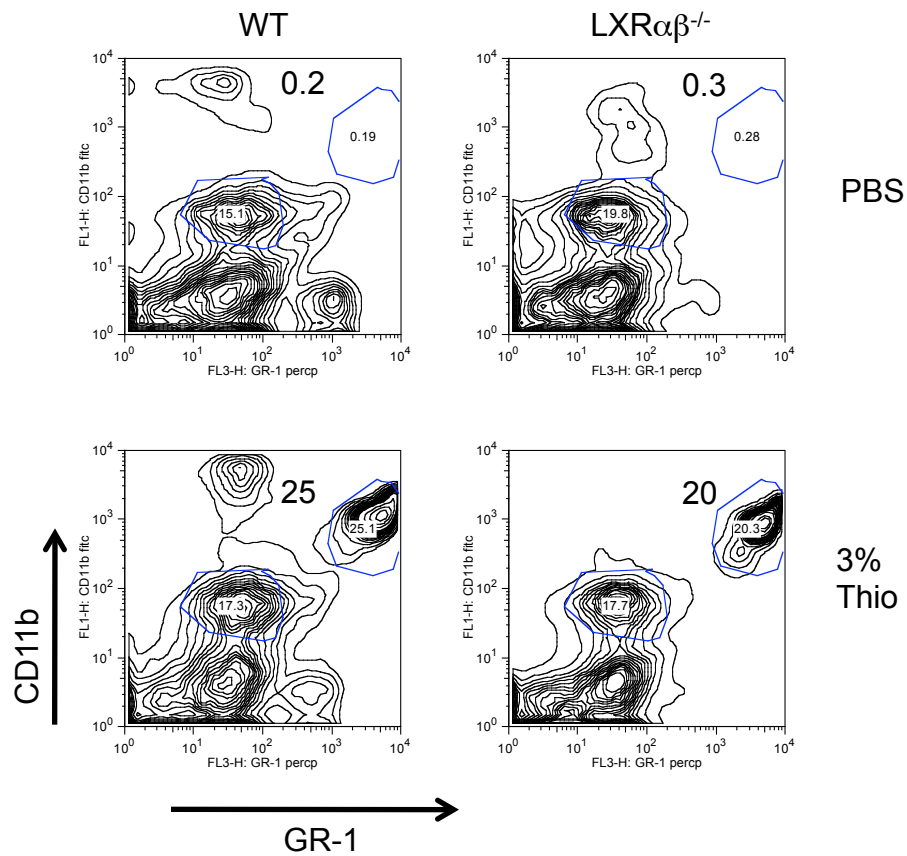

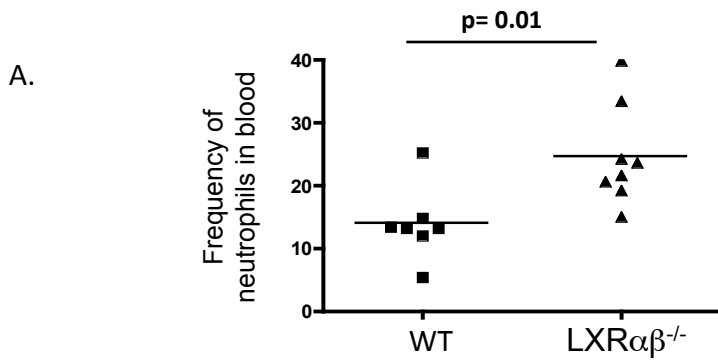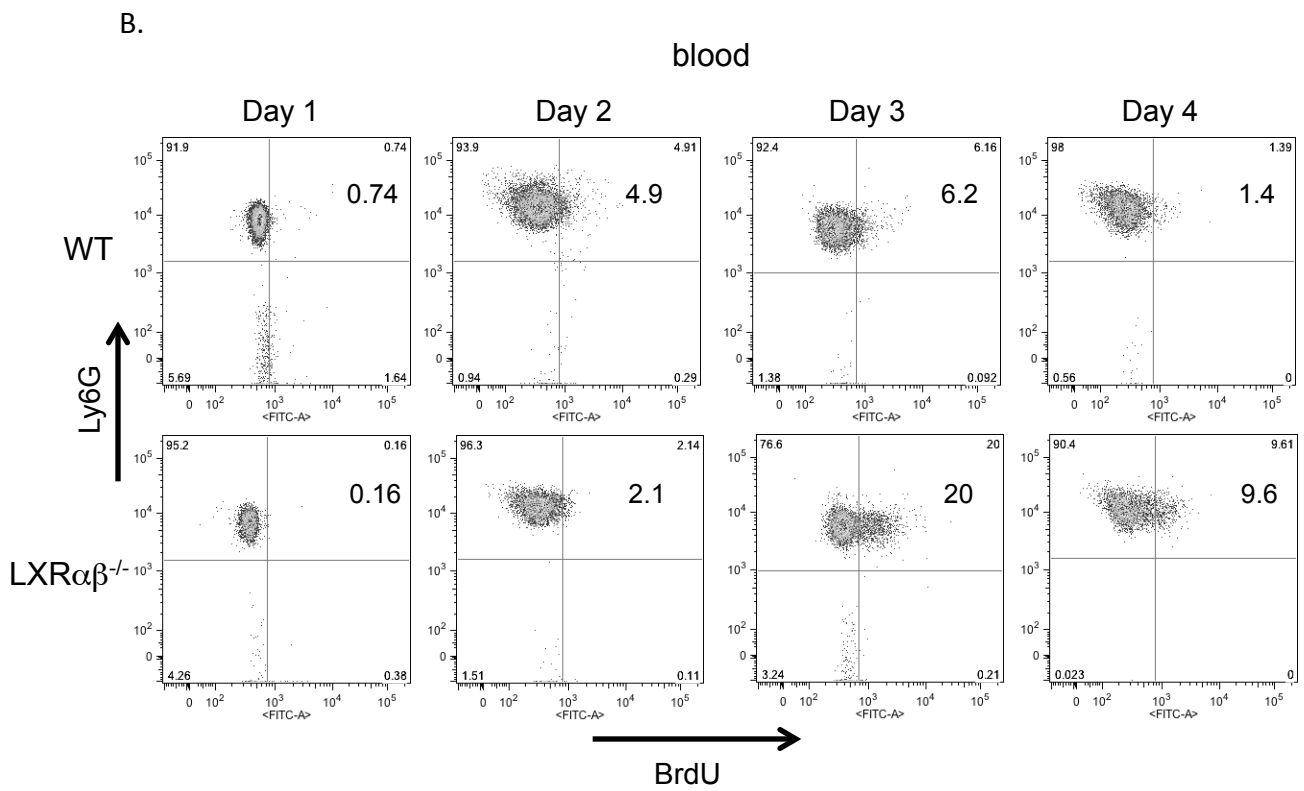

A.

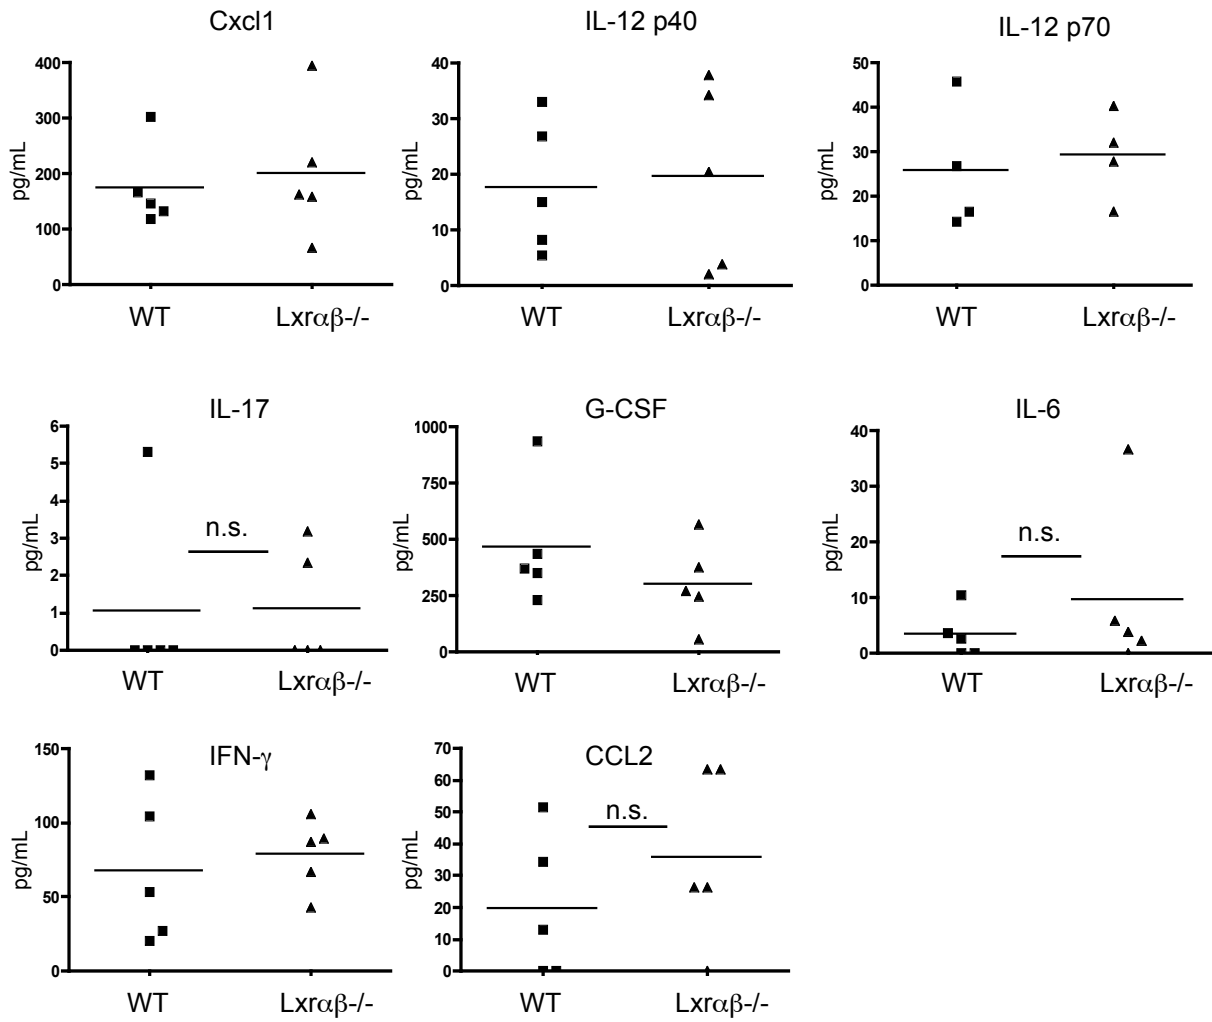

B.

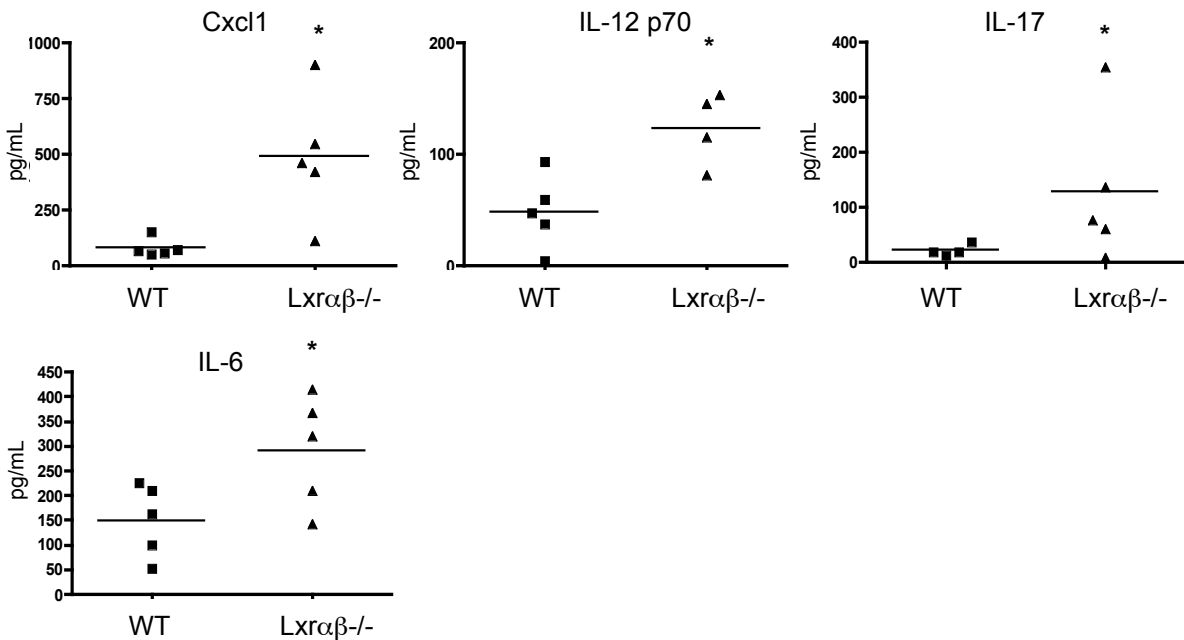



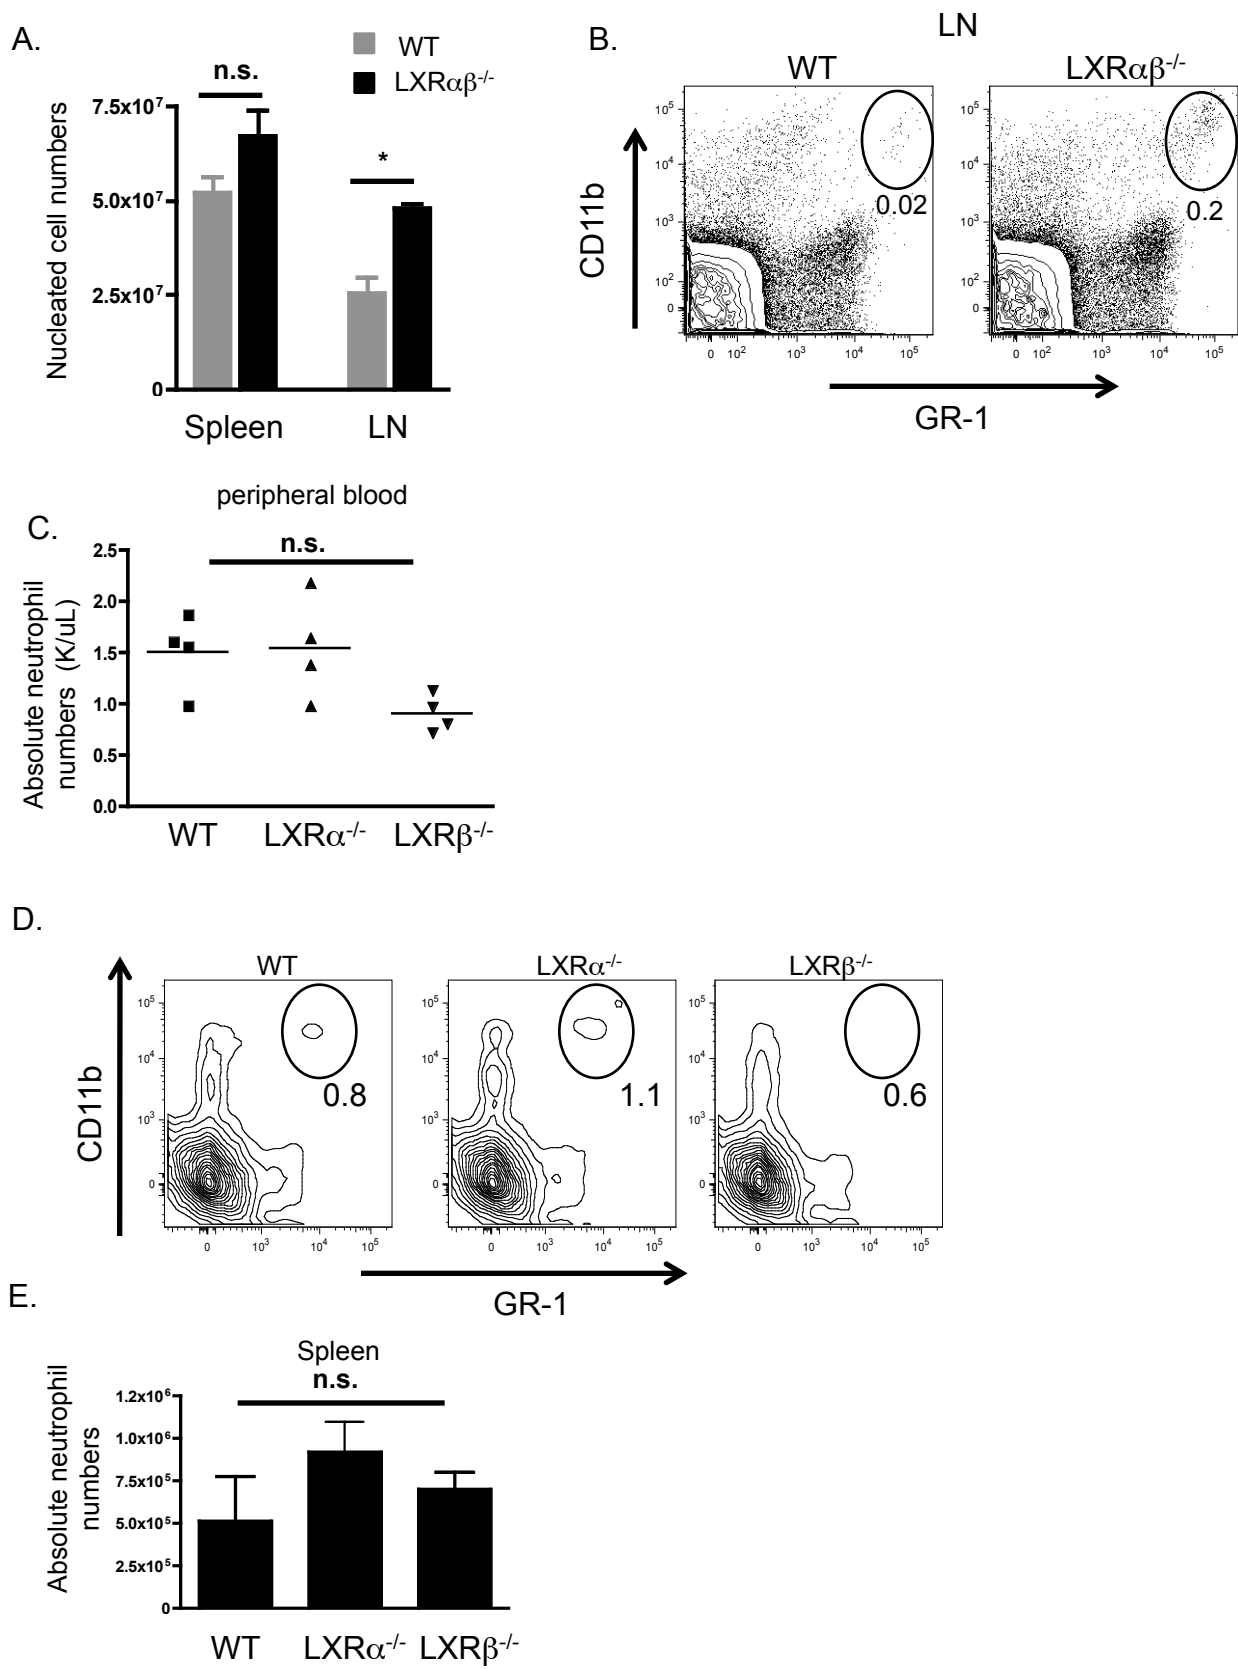

Hong Fig. S4

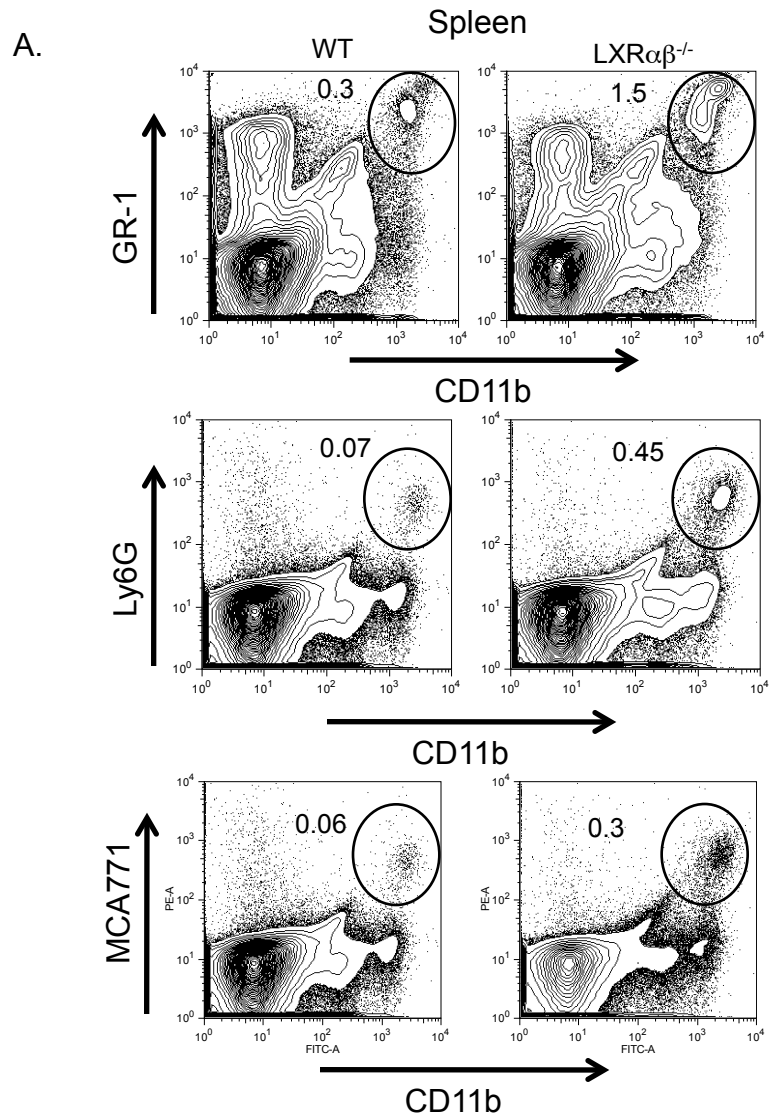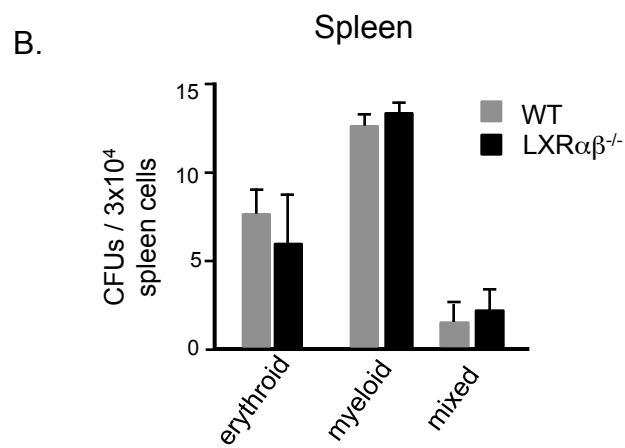

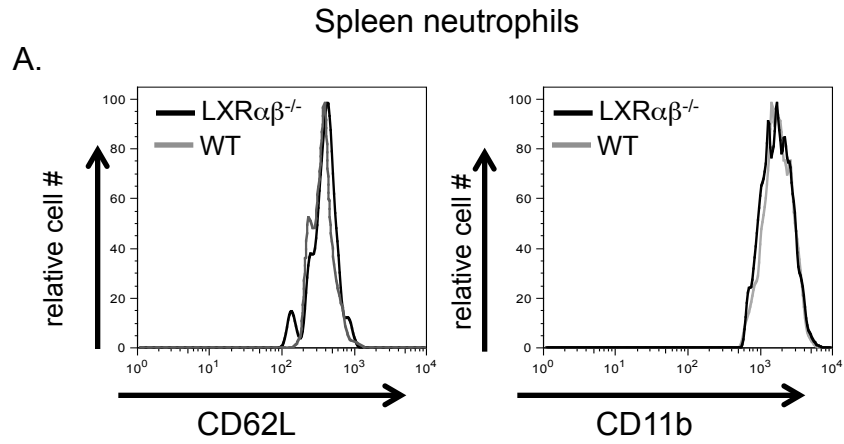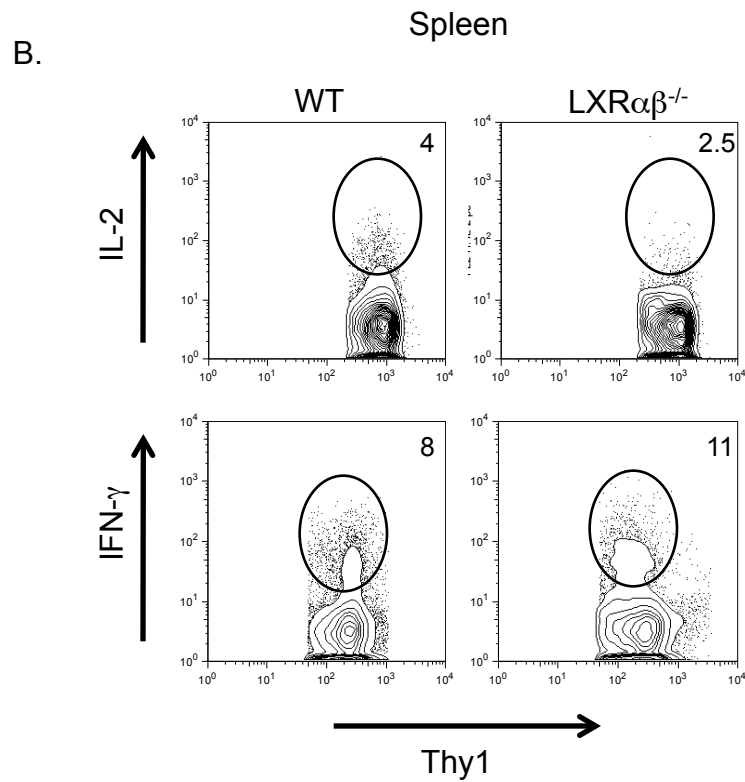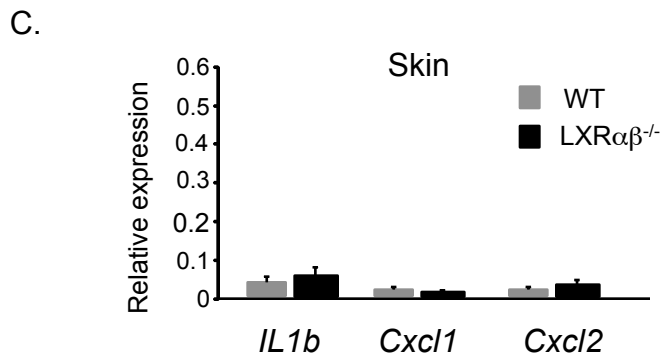

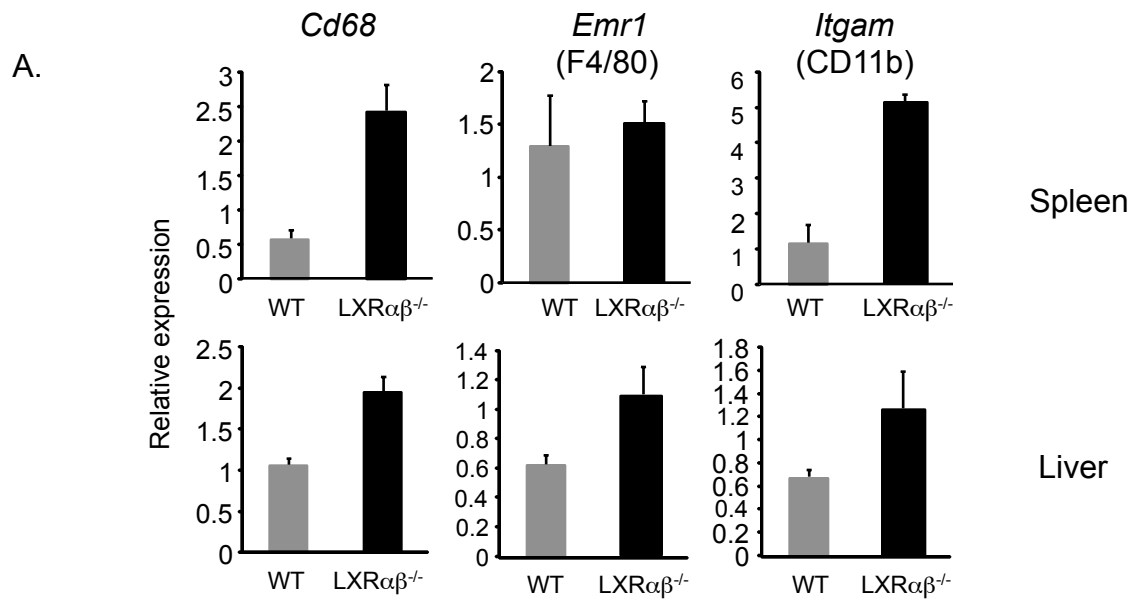

B.

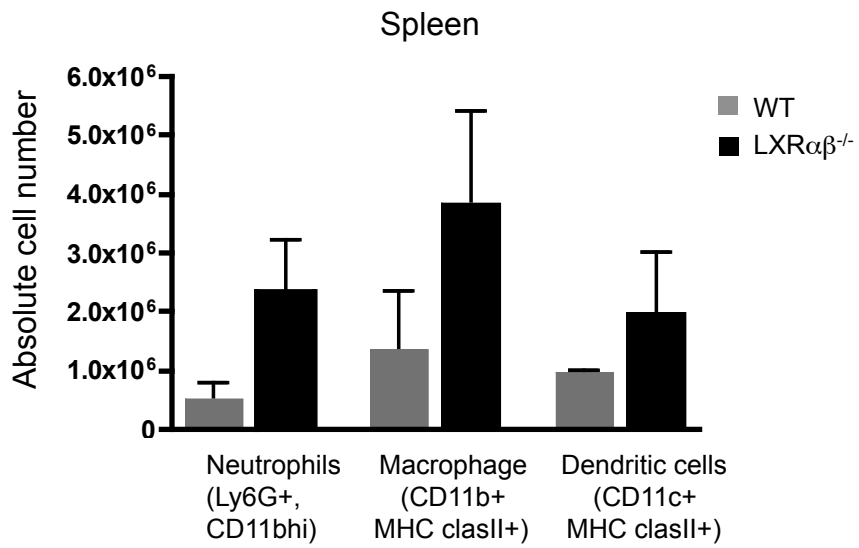

A.

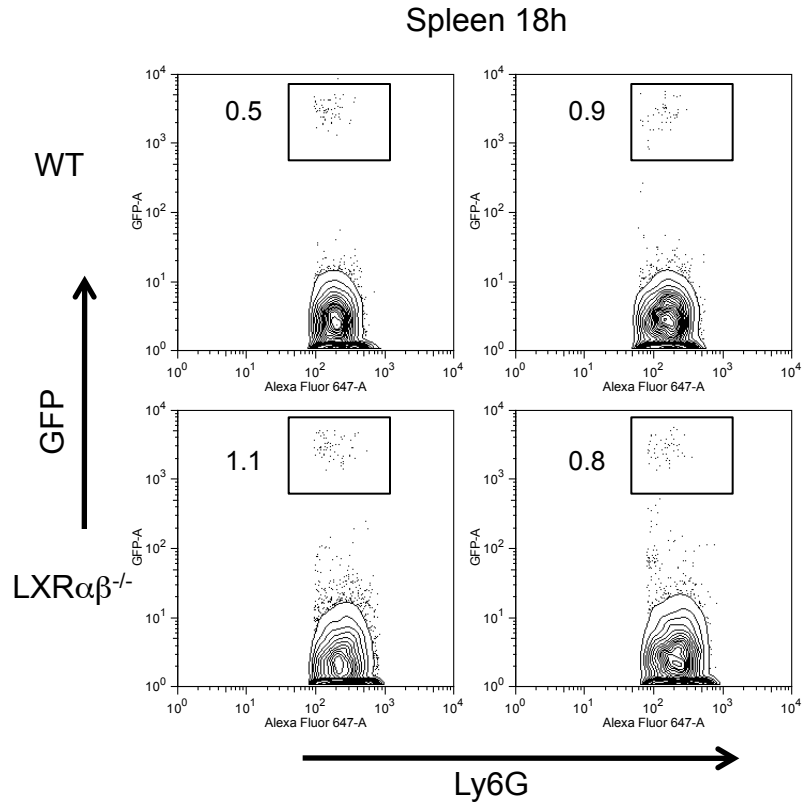

B.

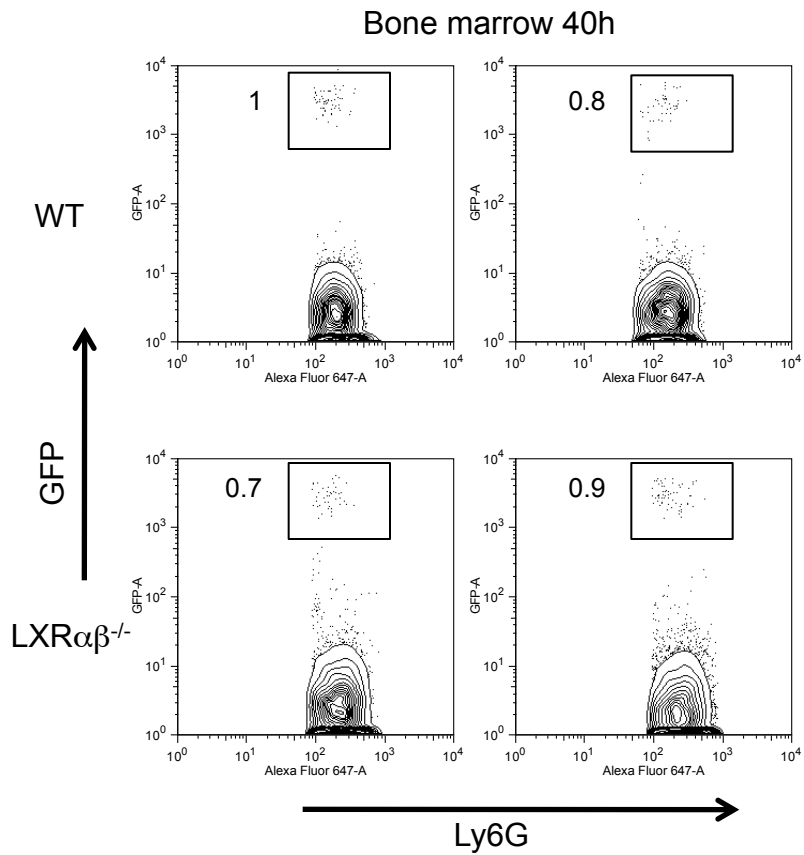

A.

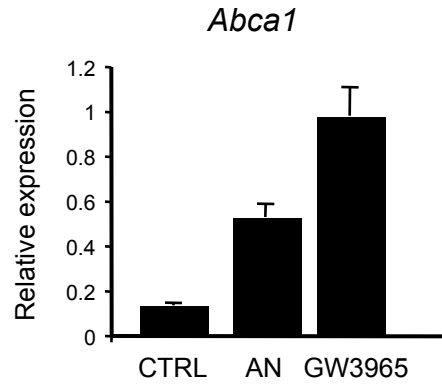

mDCs

■ DMSO ■ GW3965

B.

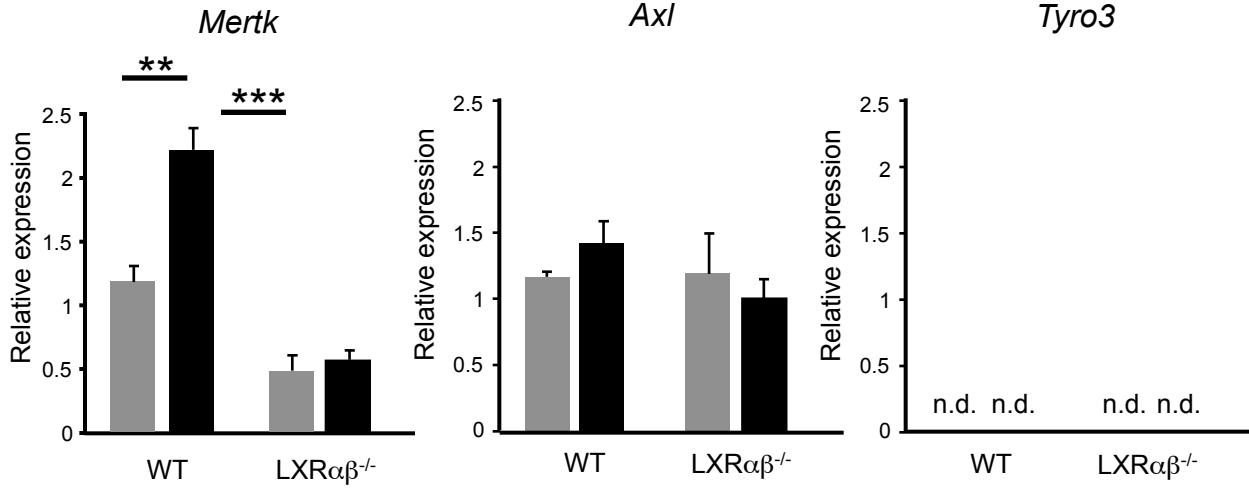

A.

BMDM

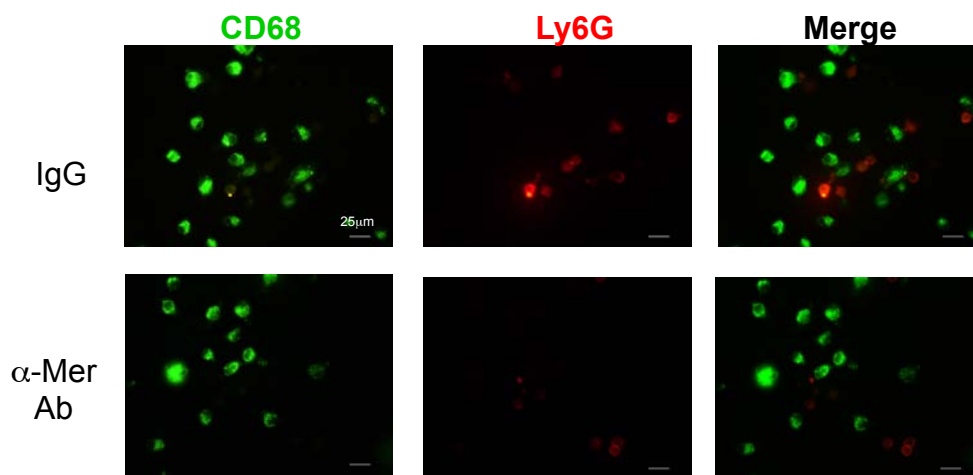

B.

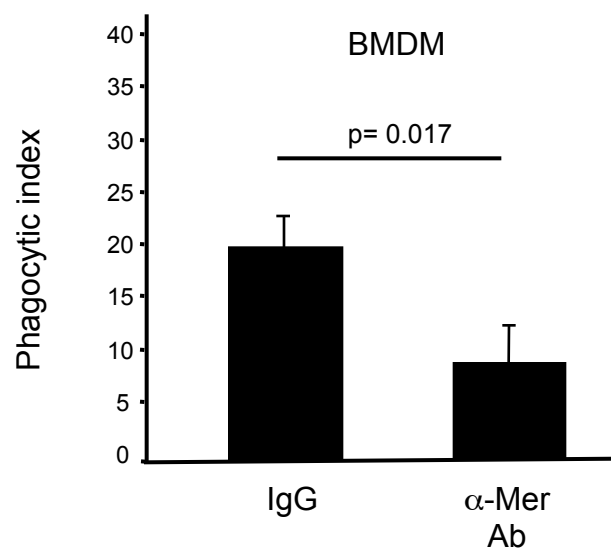

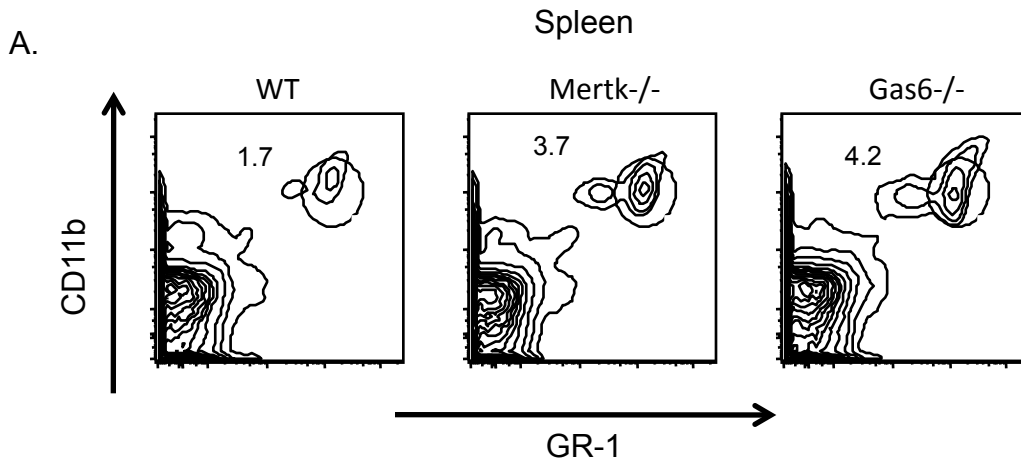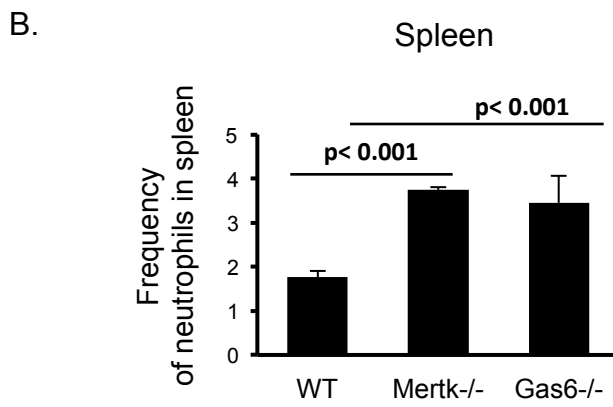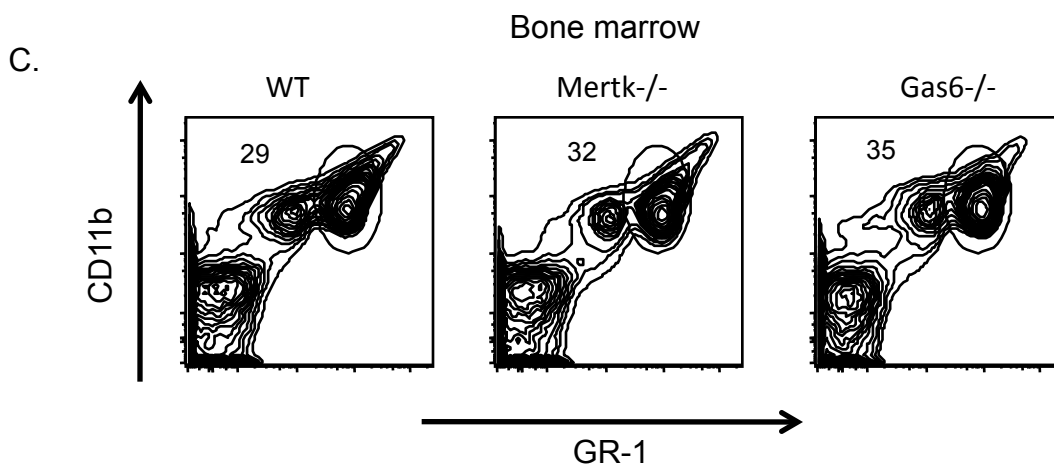



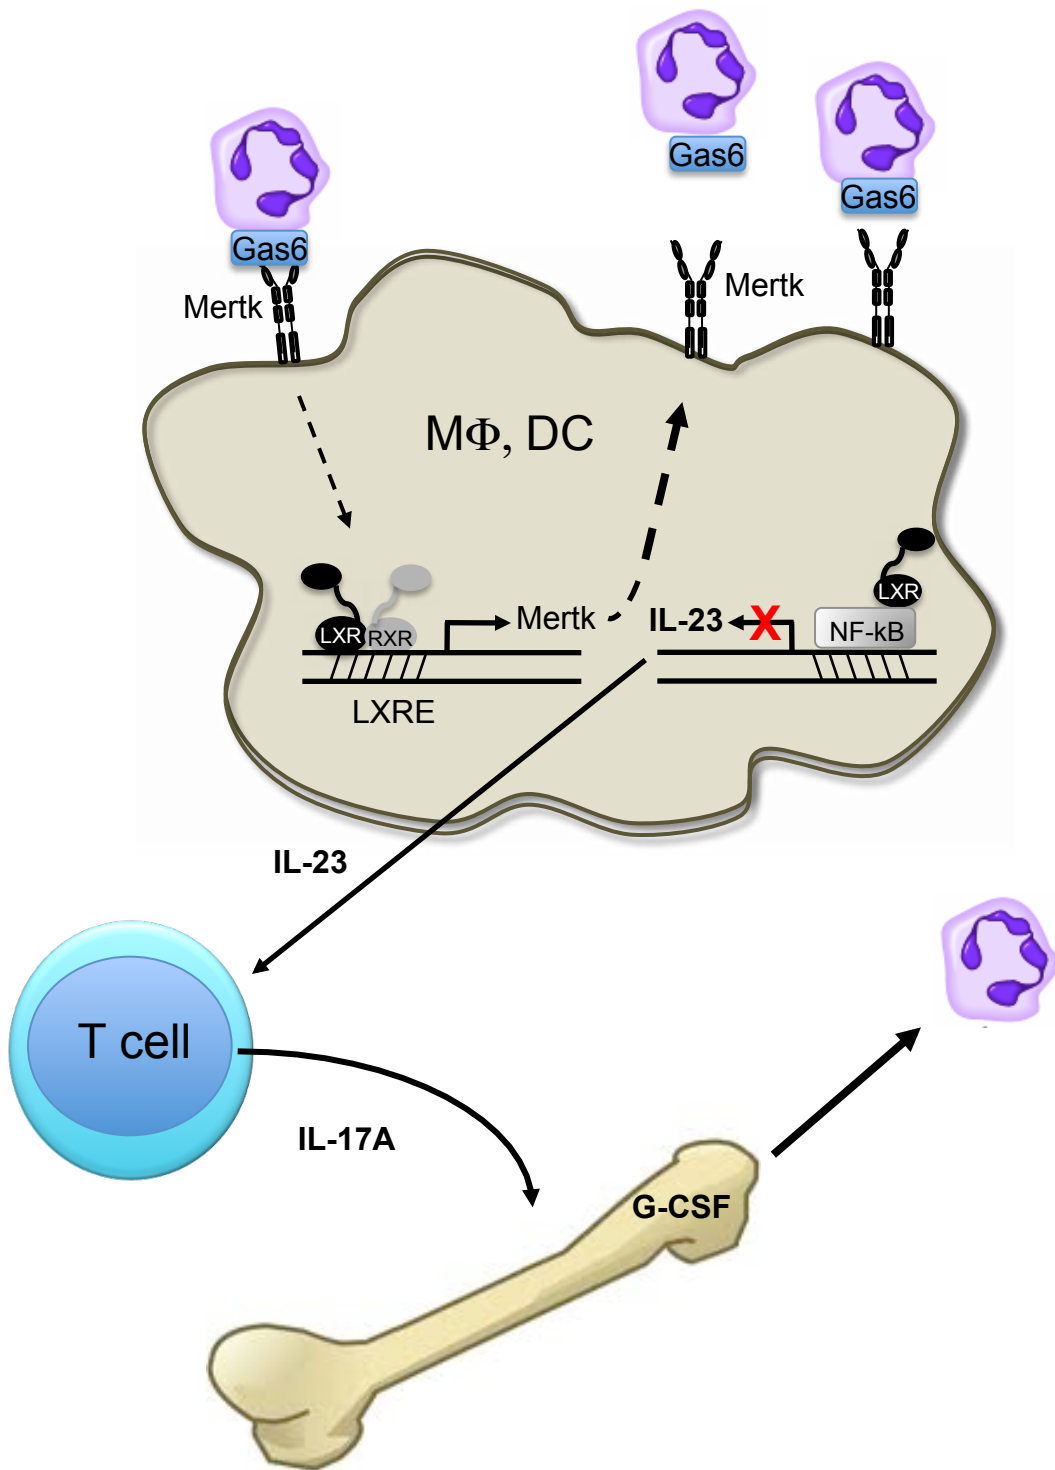

Hong Fig. S12

## Supplemental Table 1.

Primer sequences used in real-time PCR assays.

| <b><u>Gene</u></b> | <b><u>Sequence</u></b>    |
|--------------------|---------------------------|
| Rplp0 F            | agatgcagcagatccgca        |
| Rplp0 R            | gttcttgcccatcagcacc       |
| Abca1 F            | ggtttgagatggttatacaatagtt |
| Abca1 R            | cccggaaacgcaagtcc         |
| Axl F              | gagattcatacatcgggacctg    |
| Axl R              | cacacacggacatgttctca      |
| Itgam F            | caatagccagcctcagtc        |
| Itgam R            | gagcccaggggagaagtg        |
| cd68 F             | gacctacatcagagcccagtg     |
| cd68 R             | cgccatgaatgtccactg        |
| Cxcl1 F            | cactgcacccaaaccgaagt      |
| Cxcl1 R            | ggacaattttctgaaccaagg     |
| Cxcl2 F            | gcccttgagagtggctatga      |
| Cxcl2 R            | agtgaactgcgctgtcaatg      |
| Emr1 F             | gcatcatggcatacctgttc      |
| Emr1 R             | agtctgggaatgggagctaa      |
| Gas6 F             | ggatttgctacctacaggctca    |
| Gas6 R             | ttaactcccaggtggttcc       |
| IL1b F             | agaagctgtggcagctacctg     |
| IL1b R             | ggaaaagaaggtgctcatgtc     |
| IL12a F            | catcgtgagctgatgcagt       |
| IL12a R            | cagatagcccatcacctgt       |
| IL12b F            | atcgtttgctgggtgtctcc      |
| IL12b R            | ggagtccagtcacctctaca      |
| IL23a F            | gactcagccaactcctccag      |
| IL23a R            | ggcactaagggctcagtcag      |
| Mertk F            | gaggactgcttgatgaactgta    |
| Mertk R            | aggtgggtcgatccaagg        |
| Tyro3 F            | ttcagacaaagggcctagc       |
| Tyro3 R            | ataaggcctgagtcggtacg      |
